# Supplementary material
Source: publisher figshare collection journal article supplement (https://asha.figshare.com/ndownloader/files/28909593)
Supplement: Supplementary file 1 [file 28909593]

# SLP Aphasia Survey

---

## Start of Block: Intro

Q1 Thank you for your interest in participating in this study. On the next page you will see an information statement, which is the equivalent of a consent form. Please read through this. If you agree to participate, please proceed to the questionnaire. If you choose to complete the survey, the final question will give you the option to share your email to enter to win a **\$50 Amazon gift card**.

**Please note:** You may not save your answers and return later. There is no time limit to complete this questionnaire, but please be sure to leave the page open if you plan to take a break and return later. If you close your browser before you submit your answers, your answers cannot be retrieved. This survey will work on your mobile device, but text-entry may be more time-consuming. **This survey is optimized for completion on a laptop or desktop computer.**

---

Page Break

**Q2 Title of research study:** Perspectives of SLPs on Goal Setting and Treatment for Clients with Aphasia

**Investigators:** Dr. Michelle Therrien & Dr. Elizabeth Madden

**Why am I being invited to take part in a research study?** We invite you to take part in a research study if you are an SLP who currently works with clients with aphasia.

**What should I know about a research study?** Whether or not you take part is up to you. You can choose not to take part. You can agree to take part and later change your mind. Your decision will not be held against you. You can ask all the questions you want before you decide. **Why is this research being done?**

The goal of this project is to explore the perspectives and clinical practices of SLPs who work with clients with aphasia. This research will establish a foundation and justification for future research on interventions and supports for clients with aphasia. **How long will the research last and what will I need to do?** We expect that this survey will take you approximately 30 minutes to complete. The survey has three sections: **Section 1: Demographic**

**Questionnaire** **Section 2: Case Study.** Given a case study, we will ask you questions about goal setting, treatment and outcome measurement for that case. You will have the option to complete a 2nd case, but this is not required. **Section 3: General Questions about your current practice.** In this section, we will ask about priorities and considerations, given your case load and other responsibilities. We ask you to answer all questions honestly, as we want to understand current practices and priorities for SLPs working with this population. **Is there any way being in this study could be bad for me?** There is no requirement to provide identifying information as part of this research, so there is very little risk to you. If you do opt to provide your email address, know that we will store it on a password-protected University server. However, there is always a possibility of a loss in confidentiality.

**Will being in this study help me in any way?** There are no benefits to you from your taking part in this research. Possible benefits to others include informing future treatment to improve the quality of life of people with aphasia. **What happens if I do not want to be in this research?** Participation in research is completely voluntary. You can decide to participate or not to participate and you can choose to stop at any time.

**If you consent to participate in this research, click the arrow below. If not, you may close this webpage now.**

End of Block: Consent

---

Start of Block: Demographic Questions

*Display This Question:*

*If Q3 != Yes*

Q3 Are you a licensed speech-language pathologist working in the United States?

Yes (1)

No (2)

*Skip To: End of Survey If Q3 = No*

---

Q4 Does your current caseload include adults with aphasia?

Yes (1)

No (2)

*Skip To: End of Survey If Q4 = No*

---

Q74 Gender:

Male (1)

Female (2)

Non-binary (3)

Other (4)

---

Q14 Race/Ethnicity (select all that apply):

- American Indian or Alaskan Native (1)
- Asian or Asian American (2)
- Black or African American (3)
- Hispanic or Latino (4)
- Native Hawaiian or Pacific Islander (5)
- White or Caucasian (6)
- Other (7)

---

Q15 Age

---

---

Q84 In which state do you currently reside?

▼ Alabama (1) ... I do not reside in the United States (53)

---

Q81 Years of experience working as an SLP:

---

Q82

Years of experience working with clients with aphasia:

---

Q5 Current work setting:

(Select one or more answers)

- Acute care (1)
  - Inpatient Rehab (2)
  - Outpatient Rehab (3)
  - Skilled Nursing Facility/Sub-acute rehab (4)
  - Private Clinic (5)
  - Home Health (6)
  - University Clinic (7)
  - Other (please explain): (8)
- 

*Display This Question:*

*If Q5 = Other (please explain):*

Q56 You selected "other."

- Full-time (1)
  - Part-time; how many hours per week? (2)
-

---

*Display This Question:*

*If Q5 = Acute care*

Q6 You selected acute care.

Full-time (1)

Part-time; how many hours per week? (2)

\_\_\_\_\_

Other; please explain. (3) \_\_\_\_\_

---

*Display This Question:*

*If Q5 = Inpatient Rehab*

Q7 You selected inpatient rehab.

Full-time (1)

Part-time; how many hours per week? (2)

\_\_\_\_\_

Other; please explain. (3) \_\_\_\_\_

---

*Display This Question:*

*If Q5 = Outpatient Rehab*

Q8 You selected outpatient rehab.

Full-time (1)

Part-time; how many hours per week? (2)

\_\_\_\_\_

Other; please explain. (3) \_\_\_\_\_

---

*Display This Question:*

*If Q5 = Skilled Nursing Facility/Sub-acute rehab*

Q9 You selected skilled nursing facility/sub-acute rehab.

Full-time (1)

Part-time; how many hours per week? (2)

\_\_\_\_\_

Other; please explain. (3) \_\_\_\_\_

*Display This Question:*

*If Q5 = Private Clinic*

Q10 You selected private clinic.

Full-time (1)

Part-time; how many hours per week? (2)

\_\_\_\_\_

Other; please explain. (3) \_\_\_\_\_

*Display This Question:*

*If Q5 = Home Health*

Q11 You selected home health.

Full-time (1)

Part-time; how many hours per week? (2)

\_\_\_\_\_

Other; please explain. (3) \_\_\_\_\_

Display This Question:

If Q5 = University Clinic

Q12 You selected university clinic.

Full-time (1)

Part-time; how many hours per week? (2)

\_\_\_\_\_

Other; please explain. (3) \_\_\_\_\_

-----

Q73 Number of clients with aphasia on current caseload:

\_\_\_\_\_

-----

Q84 Total number of clients on current caseload:

\_\_\_\_\_

-----

Page Break

\_\_\_\_\_



## End of Block: Demographic Questions

---

### Start of Block: Case Scenario Intro

Q67 On the following page you will be presented with a case scenario representing a client. Imagine that you are seeing this client in an outpatient setting. Given the information in this scenario, you will be asked to write 2 goals you would want to target assuming that you will work with this client once a week over the next three months. You will be asked to describe your reasons for choosing those goals and treatment activities for each goal. When answering these questions, we want you to describe what you would typically do if this was a client on your caseload.

---

Page Break

---

Start of Block: Sally

Q17 Case Scenario: Sally is a 68-year-old woman who is 1 year post onset of a left middle cerebral artery (MCA) stroke and presents with subsequent moderate, nonfluent aphasia. During your initial outpatient evaluation, speech and language testing revealed mild-moderate auditory comprehension deficits, with comprehension breaking down with complex, multi-step commands. Verbal expression was characterized by utterances typically of 3-4 words in length and often agrammatical, with frequent semantic and phonological paraphasias. Content is generally appropriate yet incomplete. Expression is slow and effortful, though there is no evidence of motor speech impairment. Sally is able to repeat single words but has more difficulty with picture naming and word fluency tasks. Sally demonstrates mild-moderate reading deficits, with reading comprehension breaking down at the paragraph level. She is able to write her name and address, and copy short sentences; however, when asked to write the days of the week, she is able to produce only the first 1-2 letters of each word. Writing is slow and slightly unsteady due to use of her non-dominant, left hand. Sally reports that prior to her stroke, she ran a bakery with her husband and frequently volunteered at fundraisers and did outreach for her church, but has stopped doing so because she no longer feels comfortable reaching out to strangers. She mentioned that now she has a great deal of anxiety during interactions outside of home. When she visits the doctor's office, bank, or a store, she reports being frustrated and intimidated because she often cannot fully understand what is being said. She also reports that since the stroke she rarely speaks on the phone or socializes in person with her friends because of her difficulty keeping up with the conversation. Sally has not returned to volunteering though she stated she greatly misses interacting with her friends at church. Her husband shared that he is very concerned about his wife's loneliness and isolation from others.

*Please write 2 goals you would target for this client over the next three months and answer the related questions. Once you have completed the questions for the goals you wish to target, please scroll to the bottom of this page to either choose another scenario (optional) or proceed to the final questions in this survey. If you are targeting fewer than 2 goals, please leave the remaining answer boxes empty.*

---

Q18 Goal 1

---

Q19 What is Goal 1?

---

---

---

---

---

Q20 Why did you choose this goal?

---

---

---

---

---

Q21 What is an example of a typical treatment activity you would use to help the client achieve this goal?

---

---

---

---

---

Q29 How would you measure progress toward this goal (formally or informally)?

---

---

---

---

---

---

Q25 Goal 2

---

Q26 What is Goal 2?

---

---

---

---

---

---

Q27 Why did you choose this goal?

---

---

---

---

---

---

Q28 What is an example of a typical treatment activity you would use to help the client achieve this goal?

---

---

---

---

---

Q30 How would you measure progress towards this goal (formally or informally)?

---

---

---

---

---

End of Block: Sally

---

Start of Block: Michael

Q62 Case Scenario: Michael is a 70 year old man who is 5 years post-stroke and presents with mild aphasia characterized primarily by word retrieval difficulties, especially during conversations. He performs within normal limits, or close to it, on most standardized speech and language testing. Michael is experiencing depression and reports that he feels disconnected from others. He shared that prior to his stroke, he had a strong social network mostly built around his participation in a tennis league. He no longer attends tennis functions since he is not able to play comfortably. During the intake interview, Michael and his wife reported that he is generally understandable in one-on-one conversations at home, though his wife reported frequently becoming frustrated when trying to talk in the car or when communicating between rooms. Michael reports a great deal of difficulty communicating when socializing with friends who do not understand his aphasia and so he usually opts not to attend social gatherings at restaurants or community events even though he desires more social interaction.

*Please write 2 goals you would target for this client over the next three months and answer the related questions. Once you have completed the questions for the goals you wish to target, please scroll to the bottom of this page to either choose another scenario (optional) or proceed to the final questions in this survey. If you are targeting fewer than 2 goals, please leave the remaining answer boxes empty.*

-----

Q63 Goal 1

-----

Q64 What is Goal 1?

---

---

---

---

---

Q65 Why did you choose this goal?

---

---

---

---

---

Q66 What is an example of a typical treatment activity you would use to help the client achieve this goal?

---

---

---

---

---

Q67 How would you measure progress towards this goal (formally or informally)?

---

---

---

---

---

---

Q68 Goal 2

---

Q69 What is Goal 2?

---

---

---

---

---

---

Q70 Why did you choose this goal?

---

---

---

---

---

---

Q71 What is an example of a typical treatment activity you would use to help the client achieve this goal?

---

---

---

---

---

---

Q72 How would you measure progress towards this goal (formally or informally)?

---

---

---

---

---

---

End of Block: Michael

---

Start of Block: Block 8

Q69 Part 3 of this survey will take an additional 5-10 minutes to complete. Before proceeding to Part 3, would you like to answer questions about a second case (optional)? Please note that once you click "Next," you will not be able to return to this page to edit your responses. Remember that your participation in this survey is voluntary and you may choose to stop at any time.

- Yes, I'd like to read a second case. (1)
- No, I'd like to proceed to Part 3 of the survey. (2)

Skip To: End of Survey If Q69 =

---

Page Break

---



End of Block: Block 8

---

Start of Block: Survey Part 3

*Q38 In the following set of questions, we'll be asking you about your client's interests and priorities, and your goal-writing and treatment activities. Please consider only your clients with aphasia when answering the questions. Please be completely honest when answering the*

*questions and provide as much detail as possible, as this will ensure that the data we collect accurately reflect your experience.*

**Q39 Consider frequency when answering the following questions.**

|                                                                                                                                               | Never (1)             | Seldom (2)            | Sometimes (3)         | Often (4)             | Always (5)            |
|-----------------------------------------------------------------------------------------------------------------------------------------------|-----------------------|-----------------------|-----------------------|-----------------------|-----------------------|
| My clients with aphasia report having trouble maintaining old friendships. (1)                                                                | <input type="radio"/> |
| My clients with aphasia report having difficulty making new friends. (2)                                                                      | <input type="radio"/> |
| Caregivers report that my clients with aphasia have trouble maintaining old friendships. (3)                                                  | <input type="radio"/> |
| Caregivers report that my clients with aphasia have trouble making new friends. (4)                                                           | <input type="radio"/> |
| When conducting an initial evaluation with clients with aphasia, I gather information about their friendship development and maintenance. (5) | <input type="radio"/> |

When writing goals for clients with aphasia, I consider their friendship development and maintenance.  
(6)

    

When planning treatment for clients with aphasia, I consider their friendship development and maintenance.  
(7)

    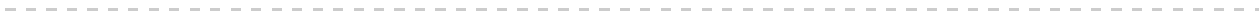

**Q41 Consider the extent to which you agree with the following statements.**

|                                                                                               | Strongly disagree (1) | Disagree (2)          | Neutral (3)           | Agree (4)             | Strongly agree (5)    |
|-----------------------------------------------------------------------------------------------|-----------------------|-----------------------|-----------------------|-----------------------|-----------------------|
| Aphasia has an impact on friendship maintenance. (1)                                          | <input type="radio"/> |
| Aphasia has an impact on friendship development (making new friends). (2)                     | <input type="radio"/> |
| Friendship plays a role in quality of life for people with aphasia. (3)                       | <input type="radio"/> |
| It is within the SLP's scope of practice to consider the impact of aphasia on friendship. (4) | <input type="radio"/> |

---

Page Break

Q42 If you wanted to know about the impact of aphasia on your client's friendships, how would you go about assessing this? Please be as detailed as possible, including names of assessments or specific assessment activities if applicable.

---

---

---

---

---

---

Q43 If your client identified challenges with friendship as a main concern, would you consider intervening to support friendship maintenance or development within your scope of practice? If so, how would you go about providing support or treatment?

---

---

---

---

---

---

Q44 What are barriers to assessing and treating friendship challenges in clients with aphasia?

---

---

---

---

---

Q45 What factors facilitate assessing and treating friendship challenges in clients with aphasia?

---

---

---

---

---

---

Q46 If friendship and social interaction were something you targeted in therapy, how would you evaluate the outcomes?

---

---

---

---

---

End of Block: Survey Part 3

---

Start of Block: Block 6

Q47 Thank you for participating in this study! If you would like to be entered in the drawing to win a \$50 Amazon gift card, please enter your email address below. Email addresses will not be stored with the survey data, and the list of email addresses will be destroyed once the drawing is complete.

- Email address: (1) \_\_\_\_\_
- No, thank you. (2)

---

Q48 Please enter your email below if you'd like us to contact you about future research projects related to this topic. For example, in the future, we may wish to interview SLPs, people with aphasia, their caregivers, family members, and/or friends. The email address list will be stored

separately from this survey data, and providing an email here is not the same as agreeing to participate in future research projects. It is simply permission for us to contact you and share information about them. Participation in research is always voluntary.

Email address: (1) \_\_\_\_\_

No, thank you. (2)

End of Block: Block 6

---
